# Supplementary material
Source: PubMed Central journal article supplement (PMC3983591)
Supplement: gmb-37-171-s002.pdf [file gmb-37-171-s002.pdf]

MS 16 - suppl mat - file\_s2.txt

| id  | fid  | mid  | sex | aff |
|-----|------|------|-----|-----|
| 2   | 2325 | 9259 | 1   | 2   |
| 35  | 9256 | 1224 | 1   | 1   |
| 41  | 63   | 2295 | 2   | 1   |
| 55  | 0    | 0    | 1   | 1   |
| 56  | 0    | 0    | 1   | 1   |
| 57  | 0    | 0    | 2   | 1   |
| 58  | 0    | 0    | 2   | 1   |
| 59  | 9244 | 74   | 1   | 1   |
| 60  | 0    | 0    | 1   | 1   |
| 61  | 73   | 75   | 2   | 1   |
| 62  | 73   | 75   | 1   | 1   |
| 63  | 73   | 75   | 1   | 1   |
| 64  | 73   | 75   | 2   | 1   |
| 65  | 73   | 75   | 2   | 1   |
| 66  | 73   | 75   | 2   | 1   |
| 67  | 73   | 75   | 1   | 1   |
| 68  | 73   | 75   | 2   | 1   |
| 69  | 76   | 1672 | 1   | 1   |
| 70  | 76   | 1672 | 2   | 1   |
| 71  | 69   | 1673 | 1   | 1   |
| 72  | 69   | 1673 | 1   | 1   |
| 73  | 0    | 0    | 1   | 1   |
| 74  | 77   | 79   | 2   | 1   |
| 75  | 77   | 79   | 2   | 1   |
| 76  | 81   | 1671 | 1   | 1   |
| 77  | 0    | 0    | 1   | 1   |
| 78  | 82   | 83   | 1   | 1   |
| 79  | 82   | 83   | 2   | 1   |
| 80  | 82   | 83   | 2   | 1   |
| 81  | 82   | 83   | 1   | 1   |
| 82  | 0    | 0    | 1   | 1   |
| 83  | 7681 | 9245 | 2   | 1   |
| 161 | 0    | 0    | 2   | 1   |
| 167 | 71   | 161  | 1   | 1   |
| 183 | 167  | 9246 | 1   | 1   |
| 185 | 183  | 9247 | 1   | 1   |
| 525 | 185  | 9248 | 2   | 2   |
| 527 | 185  | 9248 | 2   | 2   |
| 529 | 185  | 9248 | 2   | 2   |
| 553 | 62   | 58   | 1   | 1   |
| 554 | 62   | 58   | 1   | 1   |
| 555 | 62   | 58   | 1   | 1   |
| 556 | 62   | 58   | 2   | 1   |
| 557 | 62   | 58   | 2   | 1   |
| 558 | 62   | 58   | 2   | 1   |
| 559 | 62   | 58   | 2   | 1   |
| 566 | 0    | 0    | 2   | 1   |
| 763 | 9267 | 2310 | 1   | 1   |
| 771 | 763  | 1027 | 2   | 1   |
| 800 | 1007 | 771  | 2   | 2   |
| 801 | 67   | 1683 | 2   | 1   |
| 802 | 67   | 1683 | 2   | 1   |
| 803 | 67   | 1683 | 2   | 1   |
| 804 | 67   | 1683 | 2   | 1   |
| 805 | 67   | 1683 | 1   | 1   |
| 806 | 67   | 1683 | 1   | 1   |
| 819 | 56   | 64   | 1   | 1   |
| 820 | 56   | 64   | 1   | 1   |
| 821 | 56   | 64   | 2   | 1   |
| 822 | 56   | 64   | 2   | 1   |
| 823 | 56   | 64   | 2   | 1   |
| 826 | 56   | 64   | 2   | 1   |

MS 16 - suppl mat - file\_s2.txt

|      |      |      |   |   |
|------|------|------|---|---|
| 899  | 9263 | 822  | 2 | 1 |
| 901  | 9264 | 899  | 1 | 1 |
| 1005 | 9266 | 826  | 1 | 1 |
| 1007 | 1005 | 9265 | 1 | 1 |
| 1017 | 60   | 66   | 1 | 1 |
| 1018 | 60   | 66   | 2 | 1 |
| 1019 | 60   | 66   | 2 | 1 |
| 1027 | 1017 | 9268 | 2 | 1 |
| 1071 | 9269 | 1018 | 1 | 1 |
| 1073 | 9269 | 1018 | 2 | 1 |
| 1077 | 2307 | 1073 | 1 | 1 |
| 1111 | 2321 | 9251 | 1 | 1 |
| 1183 | 0    | 0    | 1 | 1 |
| 1189 | 1183 | 61   | 1 | 1 |
| 1191 | 1189 | 9262 | 1 | 1 |
| 1211 | 1191 | 9261 | 2 | 1 |
| 1224 | 1227 | 9249 | 2 | 1 |
| 1225 | 1227 | 9249 | 2 | 1 |
| 1227 | 1648 | 70   | 1 | 1 |
| 1231 | 9256 | 1224 | 1 | 1 |
| 1235 | 9256 | 1224 | 1 | 1 |
| 1394 | 901  | 1211 | 2 | 2 |
| 1399 | 901  | 1211 | 1 | 2 |
| 1419 | 2325 | 9259 | 1 | 2 |
| 1451 | 2507 | 9272 | 2 | 2 |
| 1454 | 2507 | 9272 | 2 | 2 |
| 1458 | 2507 | 9272 | 2 | 2 |
| 1459 | 2507 | 9272 | 2 | 2 |
| 1648 | 0    | 0    | 1 | 1 |
| 1667 | 1227 | 9249 | 1 | 1 |
| 1671 | 0    | 0    | 2 | 1 |
| 1672 | 0    | 0    | 2 | 1 |
| 1673 | 0    | 0    | 2 | 1 |
| 1683 | 0    | 0    | 2 | 1 |
| 1714 | 1111 | 9252 | 1 | 1 |
| 1835 | 1235 | 566  | 2 | 1 |
| 1842 | 1714 | 1835 | 1 | 1 |
| 1901 | 9254 | 1225 | 1 | 1 |
| 2261 | 1901 | 9255 | 1 | 1 |
| 2269 | 9999 | 61   | 2 | 1 |
| 2279 | 55   | 65   | 1 | 1 |
| 2280 | 55   | 65   | 2 | 1 |
| 2281 | 55   | 65   | 1 | 1 |
| 2290 | 59   | 68   | 1 | 1 |
| 2291 | 59   | 68   | 2 | 1 |
| 2292 | 59   | 68   | 2 | 1 |
| 2293 | 59   | 57   | 2 | 1 |
| 2294 | 59   | 57   | 2 | 1 |
| 2295 | 59   | 57   | 2 | 1 |
| 2306 | 63   | 2295 | 1 | 1 |
| 2307 | 63   | 2295 | 1 | 1 |
| 2308 | 63   | 2295 | 1 | 1 |
| 2309 | 63   | 2295 | 2 | 1 |
| 2310 | 63   | 2295 | 2 | 1 |
| 2311 | 63   | 2295 | 2 | 1 |
| 2312 | 63   | 2295 | 2 | 1 |
| 2313 | 63   | 2295 | 2 | 1 |
| 2314 | 63   | 2295 | 1 | 1 |
| 2317 | 9270 | 2309 | 1 | 1 |
| 2320 | 0    | 0    | 2 | 1 |
| 2321 | 1667 | 9250 | 1 | 1 |
| 2325 | 1231 | 2320 | 1 | 1 |
| 2443 | 2317 | 9271 | 2 | 1 |

MS 16 - suppl mat - file\_s2.txt

|      |      |      |   |   |
|------|------|------|---|---|
| 2446 | 1077 | 2443 | 2 | 2 |
| 2447 | 1077 | 2443 | 1 | 2 |
| 2506 | 9267 | 2310 | 2 | 1 |
| 2507 | 1071 | 2506 | 1 | 1 |
| 2511 | 0    | 0    | 2 | 1 |
| 2619 | 1231 | 2511 | 2 | 1 |
| 2622 | 9260 | 2619 | 2 | 1 |
| 2646 | 2261 | 2622 | 1 | 2 |
| 2648 | 2261 | 2622 | 1 | 2 |
| 2886 | 35   | 9257 | 2 | 1 |
| 2908 | 9258 | 2886 | 2 | 1 |
| 2920 | 1842 | 2908 | 1 | 2 |
| 2921 | 1842 | 2908 | 1 | 2 |
| 3375 | 67   | 1683 | 2 | 1 |
| 3382 | 67   | 1683 | 2 | 1 |
| 3383 | 67   | 1683 | 1 | 1 |
| 3384 | 67   | 1683 | 2 | 1 |
| 3385 | 67   | 1683 | 1 | 1 |
| 3386 | 67   | 1683 | 1 | 1 |
| 7681 | 7682 | 7683 | 1 | 1 |
| 7682 | 0    | 0    | 1 | 1 |
| 7683 | 0    | 0    | 2 | 1 |
| 7684 | 0    | 0    | 2 | 1 |
| 7685 | 7682 | 7684 | 1 | 1 |
| 7686 | 0    | 0    | 2 | 1 |
| 7687 | 7685 | 7686 | 2 | 1 |
| 7688 | 0    | 0    | 1 | 1 |
| 7689 | 7688 | 7687 | 1 | 1 |
| 7690 | 0    | 0    | 2 | 1 |
| 7691 | 7689 | 7690 | 1 | 1 |
| 7692 | 0    | 0    | 2 | 1 |
| 7694 | 7691 | 7692 | 2 | 1 |
| 7695 | 0    | 0    | 1 | 1 |
| 7696 | 0    | 0    | 2 | 1 |
| 7698 | 7695 | 7696 | 1 | 1 |
| 7699 | 0    | 0    | 2 | 1 |
| 7700 | 7698 | 7694 | 1 | 1 |
| 7701 | 7700 | 7699 | 1 | 2 |
| 9109 | 0    | 0    | 1 |   |
| 9134 | 9135 | 9273 | 1 |   |
| 9135 | 0    | 0    | 1 |   |
| 9138 | 0    | 0    | 1 |   |
| 9244 | 0    | 0    | 1 |   |
| 9245 | 0    | 0    | 2 |   |
| 9246 | 0    | 0    | 2 |   |
| 9247 | 0    | 0    | 2 |   |
| 9248 | 0    | 0    | 2 |   |
| 9249 | 0    | 0    | 2 |   |
| 9250 | 0    | 0    | 2 |   |
| 9251 | 0    | 0    | 2 |   |
| 9252 | 0    | 0    | 2 |   |
| 9254 | 0    | 0    | 1 |   |
| 9255 | 0    | 0    | 2 |   |
| 9256 | 0    | 0    | 1 |   |
| 9257 | 0    | 0    | 2 |   |
| 9258 | 0    | 0    | 1 |   |
| 9259 | 0    | 0    | 2 |   |
| 9260 | 0    | 0    | 1 |   |
| 9261 | 0    | 0    | 2 |   |
| 9262 | 0    | 0    | 2 |   |
| 9263 | 0    | 0    | 1 |   |
| 9264 | 0    | 0    | 1 |   |
| 9265 | 0    | 0    | 2 |   |

MS 16 - suppl mat - file\_s2.txt

|      |   |   |   |   |
|------|---|---|---|---|
| 9266 | 0 | 0 | 1 |   |
| 9267 | 0 | 0 | 1 |   |
| 9268 | 0 | 0 | 2 |   |
| 9269 | 0 | 0 | 1 |   |
| 9270 | 0 | 0 | 1 |   |
| 9271 | 0 | 0 | 2 |   |
| 9272 | 0 | 0 | 2 |   |
| 9273 | 0 | 0 | 2 |   |
| 9999 | 0 | 0 | 1 | 1 |
