# Supplementary material
Source: PubMed Central journal article supplement (PMC3983591)
Supplement: gmb-37-171-s003.pdf [file gmb-37-171-s003.pdf]

| Pedigree name | indiv_idnum | father_idnum | mother_idnum | Gender | Affected |
|---------------|-------------|--------------|--------------|--------|----------|
| aic_gemepo_v3 | 41          | 63           | 2295         | F      | 1        |
| aic_gemepo_v3 | 55          | 0            | 0            | M      | 1        |
| aic_gemepo_v3 | 56          | 0            | 0            | M      | 1        |
| aic_gemepo_v3 | 57          | 0            | 0            | F      | 1        |
| aic_gemepo_v3 | 58          | 0            | 0            | F      | 1        |
| aic_gemepo_v3 | 59          | 9244         | 74           | M      | 1        |
| aic_gemepo_v3 | 60          | 0            | 0            | M      | 1        |
| aic_gemepo_v3 | 61          | 73           | 75           | F      | 1        |
| aic_gemepo_v3 | 62          | 73           | 75           | M      | 1        |
| aic_gemepo_v3 | 63          | 73           | 75           | M      | 1        |
| aic_gemepo_v3 | 64          | 73           | 75           | F      | 1        |
| aic_gemepo_v3 | 65          | 73           | 75           | F      | 1        |
| aic_gemepo_v3 | 66          | 73           | 75           | F      | 1        |
| aic_gemepo_v3 | 67          | 73           | 75           | M      | 1        |

|               |    |    |      |   |   |
|---------------|----|----|------|---|---|
| aic_gemepo_v3 | 68 | 73 | 75   | F | 1 |
| aic_gemepo_v3 | 69 | 76 | 1672 | M | 1 |
| aic_gemepo_v3 | 70 | 76 | 1672 | F | 1 |
| aic_gemepo_v3 | 71 | 69 | 1673 | M | 1 |
| aic_gemepo_v3 | 72 | 69 | 1673 | M | 1 |
| aic_gemepo_v3 | 73 | 0  | 0    | M | 1 |
| aic_gemepo_v3 | 74 | 77 | 79   | F | 1 |
| aic_gemepo_v3 | 75 | 77 | 79   | F | 1 |
| aic_gemepo_v3 | 76 | 81 | 1671 | M | 1 |
| aic_gemepo_v3 | 77 | 0  | 0    | M | 1 |
| aic_gemepo_v3 | 78 | 82 | 83   | M | 1 |
| aic_gemepo_v3 | 79 | 82 | 83   | F | 1 |
| aic_gemepo_v3 | 80 | 82 | 83   | F | 1 |
| aic_gemepo_v3 | 81 | 82 | 83   | M | 1 |

|               |     |      |      |   |   |
|---------------|-----|------|------|---|---|
| aic_gemepo_v3 | 82  | 0    | 0    | M | 1 |
| aic_gemepo_v3 | 83  | 7681 | 9245 | F | 1 |
| aic_gemepo_v3 | 553 | 62   | 58   | M | 1 |
| aic_gemepo_v3 | 554 | 62   | 58   | M | 1 |
| aic_gemepo_v3 | 555 | 62   | 58   | M | 1 |
| aic_gemepo_v3 | 556 | 62   | 58   | F | 1 |
| aic_gemepo_v3 | 557 | 62   | 58   | F | 1 |
| aic_gemepo_v3 | 558 | 62   | 58   | F | 1 |
| aic_gemepo_v3 | 559 | 62   | 58   | F | 1 |
| aic_gemepo_v3 | 801 | 67   | 1683 | F | 1 |
| aic_gemepo_v3 | 802 | 67   | 1683 | F | 1 |
| aic_gemepo_v3 | 803 | 67   | 1683 | F | 1 |
| aic_gemepo_v3 | 804 | 67   | 1683 | F | 1 |
| aic_gemepo_v3 | 805 | 67   | 1683 | M | 1 |
| aic_gemepo_v3 | 806 | 67   | 1683 | M | 1 |

|               |      |      |    |   |   |
|---------------|------|------|----|---|---|
| aic_gemepo_v3 | 819  | 56   | 64 | M | 1 |
| aic_gemepo_v3 | 820  | 56   | 64 | M | 1 |
| aic_gemepo_v3 | 821  | 56   | 64 | F | 1 |
| aic_gemepo_v3 | 822  | 56   | 64 | F | 1 |
| aic_gemepo_v3 | 823  | 56   | 64 | F | 1 |
| aic_gemepo_v3 | 826  | 56   | 64 | F | 1 |
| aic_gemepo_v3 | 1017 | 60   | 66 | M | 1 |
| aic_gemepo_v3 | 1018 | 60   | 66 | F | 1 |
| aic_gemepo_v3 | 1019 | 60   | 66 | F | 1 |
| aic_gemepo_v3 | 1183 | 0    | 0  | M | 1 |
| aic_gemepo_v3 | 1189 | 1183 | 61 | M | 1 |
| aic_gemepo_v3 | 1671 | 0    | 0  | F | 1 |
| aic_gemepo_v3 | 1672 | 0    | 0  | F | 1 |
| aic_gemepo_v3 | 1673 | 0    | 0  | F | 1 |

|               |      |      |      |   |   |
|---------------|------|------|------|---|---|
| aic_gemepo_v3 | 1683 | 0    | 0    | F | 1 |
| aic_gemepo_v3 | 2269 | 9999 | 61   | F | 1 |
| aic_gemepo_v3 | 2279 | 55   | 65   | M | 1 |
| aic_gemepo_v3 | 2280 | 55   | 65   | F | 1 |
| aic_gemepo_v3 | 2281 | 55   | 65   | M | 1 |
| aic_gemepo_v3 | 2290 | 59   | 68   | M | 1 |
| aic_gemepo_v3 | 2291 | 59   | 68   | F | 1 |
| aic_gemepo_v3 | 2292 | 59   | 68   | F | 1 |
| aic_gemepo_v3 | 2293 | 59   | 57   | F | 1 |
| aic_gemepo_v3 | 2294 | 59   | 57   | F | 1 |
| aic_gemepo_v3 | 2295 | 59   | 57   | F | 1 |
| aic_gemepo_v3 | 2306 | 63   | 2295 | M | 1 |
| aic_gemepo_v3 | 2307 | 63   | 2295 | M | 1 |
| aic_gemepo_v3 | 2308 | 63   | 2295 | M | 1 |
| aic_gemepo_v3 | 2309 | 63   | 2295 | F | 1 |

|               |      |      |      |   |   |
|---------------|------|------|------|---|---|
| aic_gemepo_v3 | 2310 | 63   | 2295 | F | 1 |
| aic_gemepo_v3 | 2311 | 63   | 2295 | F | 1 |
| aic_gemepo_v3 | 2312 | 63   | 2295 | F | 1 |
| aic_gemepo_v3 | 2313 | 63   | 2295 | F | 1 |
| aic_gemepo_v3 | 2314 | 63   | 2295 | M | 1 |
| aic_gemepo_v3 | 3375 | 67   | 1683 | F | 1 |
| aic_gemepo_v3 | 3382 | 67   | 1683 | F | 1 |
| aic_gemepo_v3 | 3383 | 67   | 1683 | M | 1 |
| aic_gemepo_v3 | 3384 | 67   | 1683 | F | 1 |
| aic_gemepo_v3 | 3385 | 67   | 1683 | M | 1 |
| aic_gemepo_v3 | 3386 | 67   | 1683 | M | 1 |
| aic_gemepo_v3 | 7681 | 7682 | 7683 | M | 1 |
| aic_gemepo_v3 | 7682 | 0    | 0    | M | 1 |
| aic_gemepo_v3 | 7683 | 0    | 0    | F | 1 |

|               |      |      |      |   |   |
|---------------|------|------|------|---|---|
| aic_gemepo_v3 | 7684 | 0    | 0    | F | 1 |
| aic_gemepo_v3 | 7685 | 7682 | 7684 | M | 1 |
| aic_gemepo_v3 | 7686 | 0    | 0    | F | 1 |
| aic_gemepo_v3 | 7687 | 7685 | 7686 | F | 1 |
| aic_gemepo_v3 | 7688 | 0    | 0    | M | 1 |
| aic_gemepo_v3 | 7689 | 7688 | 7687 | M | 1 |
| aic_gemepo_v3 | 7690 | 0    | 0    | F | 1 |
| aic_gemepo_v3 | 7691 | 7689 | 7690 | M | 1 |
| aic_gemepo_v3 | 7692 | 0    | 0    | F | 1 |
| aic_gemepo_v3 | 7694 | 7691 | 7692 | F | 1 |
| aic_gemepo_v3 | 7695 | 0    | 0    | M | 1 |
| aic_gemepo_v3 | 7698 | 7695 | 7696 | M | 1 |
| aic_gemepo_v3 | 7699 | 0    | 0    | F | 1 |
| aic_gemepo_v3 | 7700 | 7698 | 7694 | M | 1 |
| aic_gemepo_v3 | 9999 | 0    | 0    | M | 1 |

|               |      |      |      |   |   |
|---------------|------|------|------|---|---|
| aic_gemepo_v3 | 7696 | 0    | 0    | F | 1 |
| aic_gemepo_v3 | 9109 | 0    | 0    | M |   |
| aic_gemepo_v3 | 9134 | 9135 | 0    | M |   |
| aic_gemepo_v3 | 9135 | 0    | 0    | M |   |
| aic_gemepo_v3 | 9138 | 0    | 0    | M |   |
| aic_gemepo_v3 | 167  | 71   | 161  | M | 1 |
| aic_gemepo_v3 | 183  | 167  | 9246 | M | 1 |
| aic_gemepo_v3 | 185  | 183  | 9247 | M | 1 |
| aic_gemepo_v3 | 525  | 185  | 9248 | F | 2 |
| aic_gemepo_v3 | 527  | 185  | 9248 | F | 2 |
| aic_gemepo_v3 | 529  | 185  | 9248 | F | 2 |
| aic_gemepo_v3 | 161  | 0    | 0    | F | 1 |
| aic_gemepo_v3 | 1227 | 1648 | 70   | M | 1 |
| aic_gemepo_v3 | 1667 | 1227 | 9249 | M | 1 |



|               |      |      |      |   |   |
|---------------|------|------|------|---|---|
| aic_gemepo_v3 | 1225 | 1227 | 9249 | F | 1 |
| aic_gemepo_v3 | 1224 | 1227 | 9249 | F | 1 |
| aic_gemepo_v3 | 2321 | 1667 | 9250 | M | 1 |
| aic_gemepo_v3 | 1111 | 2321 | 9251 | M | 1 |
| aic_gemepo_v3 | 1714 | 1111 | 9252 | M | 1 |
| aic_gemepo_v3 | 1842 | 1714 | 1835 | M | 1 |
| aic_gemepo_v3 | 2920 | 1842 | 2908 | M | 2 |
| aic_gemepo_v3 | 2921 | 1842 | 2908 | M | 2 |
| aic_gemepo_v3 | 35   | 9256 | 1224 | M | 1 |
| aic_gemepo_v3 | 1231 | 9256 | 1224 | M | 1 |
| aic_gemepo_v3 | 1235 | 9256 | 1224 | M | 1 |
| aic_gemepo_v3 | 2886 | 35   | 9257 | F | 1 |
| aic_gemepo_v3 | 2908 | 9258 | 2886 | F | 1 |
| aic_gemepo_v3 | 1835 | 1235 | 566  | F | 1 |
| aic_gemepo_v3 | 566  | 0    | 0    | F | 1 |

|               |      |      |      |   |   |
|---------------|------|------|------|---|---|
| aic_gemepo_v3 | 2325 | 1231 | 2320 | M | 1 |
| aic_gemepo_v3 | 2    | 2325 | 9259 | M | 2 |
| aic_gemepo_v3 | 1419 | 2325 | 9259 | M | 2 |
| aic_gemepo_v3 | 2320 | 0    | 0    | F | 1 |
| aic_gemepo_v3 | 2511 | 0    | 0    | F | 1 |
| aic_gemepo_v3 | 2619 | 1231 | 2511 | F | 1 |
| aic_gemepo_v3 | 2622 | 9260 | 2619 | F | 1 |
| aic_gemepo_v3 | 1901 | 9254 | 1225 | M | 1 |
| aic_gemepo_v3 | 2261 | 1901 | 9255 | M | 1 |
| aic_gemepo_v3 | 2646 | 2261 | 2622 | M | 2 |
| aic_gemepo_v3 | 2648 | 2261 | 2622 | M | 2 |
| aic_gemepo_v3 | 1648 | 0    | 0    | M | 1 |
| aic_gemepo_v3 | 899  | 9263 | 822  | F | 1 |
| aic_gemepo_v3 | 901  | 9264 | 899  | M | 1 |

|               |      |      |      |   |   |
|---------------|------|------|------|---|---|
| aic_gemepo_v3 | 1399 | 901  | 1211 | M | 2 |
| aic_gemepo_v3 | 1394 | 901  | 1211 | F | 2 |
| aic_gemepo_v3 | 1191 | 1189 | 9262 | M | 1 |
| aic_gemepo_v3 | 1211 | 1191 | 9261 | F | 1 |
| aic_gemepo_v3 | 1005 | 9266 | 826  | M | 1 |
| aic_gemepo_v3 | 1007 | 1005 | 9265 | M | 1 |
| aic_gemepo_v3 | 800  | 1007 | 771  | F | 2 |
| aic_gemepo_v3 | 763  | 9267 | 2310 | M | 1 |
| aic_gemepo_v3 | 771  | 763  | 1027 | F | 1 |
| aic_gemepo_v3 | 1027 | 1017 | 9268 | F | 1 |
| aic_gemepo_v3 | 1073 | 9269 | 1018 | F | 1 |
| aic_gemepo_v3 | 1077 | 2307 | 1073 | M | 1 |
| aic_gemepo_v3 | 2317 | 9270 | 2309 | M | 1 |
| aic_gemepo_v3 | 2443 | 2317 | 9271 | F | 1 |
| aic_gemepo_v3 | 2446 | 1077 | 2443 | F | 2 |

|               |      |      |      |   |   |
|---------------|------|------|------|---|---|
| aic_gemepo_v3 | 2447 | 1077 | 2443 | M | 2 |
| aic_gemepo_v3 | 1071 | 9269 | 1018 | M | 1 |
| aic_gemepo_v3 | 2506 | 9267 | 2310 | F | 1 |
| aic_gemepo_v3 | 2507 | 1071 | 2506 | M | 1 |
| aic_gemepo_v3 | 1451 | 2507 | 9272 | F | 2 |
| aic_gemepo_v3 | 1454 | 2507 | 9272 | F | 2 |
| aic_gemepo_v3 | 1458 | 2507 | 9272 | F | 2 |
| aic_gemepo_v3 | 1459 | 2507 | 9272 | F | 2 |
| aic_gemepo_v3 | 7701 | 7700 | 7699 | M | 2 |
| aic_gemepo_v3 | 9244 | 0    | 0    | M |   |
| aic_gemepo_v3 | 9245 | 0    | 0    | F |   |
| aic_gemepo_v3 | 9246 | 0    | 0    | F |   |
| aic_gemepo_v3 | 9247 | 0    | 0    | F |   |
| aic_gemepo_v3 | 9248 | 0    | 0    | F |   |

|               |      |   |   |   |
|---------------|------|---|---|---|
| aic_gemepo_v3 | 9249 | 0 | 0 | F |
| aic_gemepo_v3 | 9250 | 0 | 0 | F |
| aic_gemepo_v3 | 9251 | 0 | 0 | F |
| aic_gemepo_v3 | 9252 | 0 | 0 | F |
| aic_gemepo_v3 | 9254 | 0 | 0 | M |
| aic_gemepo_v3 | 9255 | 0 | 0 | F |
| aic_gemepo_v3 | 9256 | 0 | 0 | M |
| aic_gemepo_v3 | 9257 | 0 | 0 | F |
| aic_gemepo_v3 | 9258 | 0 | 0 | M |
| aic_gemepo_v3 | 9259 | 0 | 0 | F |
| aic_gemepo_v3 | 9260 | 0 | 0 | M |
| aic_gemepo_v3 | 9261 | 0 | 0 | F |
| aic_gemepo_v3 | 9262 | 0 | 0 | F |
| aic_gemepo_v3 | 9263 | 0 | 0 | M |
| aic_gemepo_v3 | 9264 | 0 | 0 | M |

|               |      |   |   |   |
|---------------|------|---|---|---|
| aic_gemepo_v3 | 9265 | 0 | 0 | F |
| aic_gemepo_v3 | 9266 | 0 | 0 | M |
| aic_gemepo_v3 | 9267 | 0 | 0 | M |
| aic_gemepo_v3 | 9268 | 0 | 0 | F |
| aic_gemepo_v3 | 9269 | 0 | 0 | M |
| aic_gemepo_v3 | 9270 | 0 | 0 | M |
| aic_gemepo_v3 | 9271 | 0 | 0 | F |
| aic_gemepo_v3 | 9272 | 0 | 0 | F |
