# Supplementary material
Source: PubMed Central journal article supplement (PMC3983591)
Supplement: gmb-37-171-s004.pdf [file gmb-37-171-s004.pdf]

Remember you have agreed to add an appropriate statement (including the NIH grant number) under "acknowledgments" in any publication of results obtained by using this program. Suggested wording is:

"(Some of)The results of this paper were obtained by using the software package S.A.G.E., which was supported by a U.S. Public Health Service Resource Grant (RR03655) from the National Center for Research Resources."

| General Statistics: All Pedigrees |                |                       |             |                      |           |
|-----------------------------------|----------------|-----------------------|-------------|----------------------|-----------|
|                                   | Count          | Mean Size +/-         | Std. Dev. ( | Min.,                | Max.)     |
| Pedigrees                         | 1              | 196.00 +/-            | ---         | ( 196,               | 196)      |
| Generation Statistics             |                | Nuc Family Statistics |             | Inh Vector Bit Stats |           |
| # of Gens                         | # of Peds      | # of Nuc Fams         | # of Peds   | # of Bits            | # of Peds |
| undet.                            | 1              | 65 - 128              | 1           | 129 - 256            | 1         |
|                                   | Count          | Mean Size +/-         | Std. Dev. ( | Min.,                | Max.)     |
| Sibships                          | 67             | 2.01 +/-              | 2.11 (      | 1,                   | 12)       |
| Constituent Pedigrees             | Marriage Rings | Loops                 |             |                      |           |
| 1                                 | 0              | 11                    |             |                      |           |
| Pairs                             | Count          | Individuals           | Count       |                      |           |
| Parent/Off                        | 270            | Male                  | 94          |                      |           |
| Sib/Sib                           | 218            | Female                | 101         |                      |           |
| Sis/Sis                           | 75             | Unknown               | 0           |                      |           |
| Bro/Bro                           | 32             | Total                 | 196         |                      |           |
| Bro/Sis                           | 111            |                       |             |                      |           |
| Grandp.                           | 318            | Founder               | 57          |                      |           |
| Avunc.                            | 438            | Non-founder           | 135         |                      |           |
| Half Sib                          | 12             | Singleton             | 4           |                      |           |
| Cousin                            | 912            | Total                 | 196         |                      |           |
| Individuals with Multiple Mates   |                |                       |             |                      |           |
| (Pedigree, Individual)            | Mates          |                       |             |                      |           |
| (aic_gemepo_v3, 1231)             | 2320, 2511     |                       |             |                      |           |
| (aic_gemepo_v3, 59)               | 68, 57         |                       |             |                      |           |
| (aic_gemepo_v3, 61)               | 1183, 9999     |                       |             |                      |           |
| (aic_gemepo_v3, 7682)             | 7683, 7684     |                       |             |                      |           |
| Consanguineous Mating Pairs       |                |                       |             |                      |           |
| Pedigree                          | Pair           |                       |             |                      |           |
| aic_gemepo_v3                     | 1007, 771      |                       |             |                      |           |
| aic_gemepo_v3                     | 1027, 763      |                       |             |                      |           |
| aic_gemepo_v3                     | 1071, 2506     |                       |             |                      |           |
| aic_gemepo_v3                     | 1073, 2307     |                       |             |                      |           |
| aic_gemepo_v3                     | 1077, 2443     |                       |             |                      |           |
| aic_gemepo_v3                     | 1211, 901      |                       |             |                      |           |
| aic_gemepo_v3                     | 1714, 1835     |                       |             |                      |           |
| aic_gemepo_v3                     | 1842, 2908     |                       |             |                      |           |
| aic_gemepo_v3                     | 2261, 2622     |                       |             |                      |           |
| aic_gemepo_v3                     | 2295, 63       |                       |             |                      |           |
| aic_gemepo_v3                     | 59, 68         |                       |             |                      |           |

| Trait Statistics: All Pedigrees, Trait - ALBINO |                   |                         |                   |           |       |        |
|-------------------------------------------------|-------------------|-------------------------|-------------------|-----------|-------|--------|
|                                                 | 0 Parents w. Data | 1 Parent w. Data        | 2 Parents w. Data |           |       |        |
| Sibships                                        | 0                 | 28                      | 39                |           |       |        |
|                                                 | Count             | Mean Size +/- Std. Dev. | ( Min., Max.)     |           |       |        |
| Sibships                                        | 67                | 2.01 +/- 2.11           | ( 1, 12)          |           |       |        |
| Pedigrees                                       | 1                 | 164.00 +/- ---          | ( 164, 164)       |           |       |        |
| Nuc Family Statistics                           |                   |                         |                   |           |       |        |
| # of Nuc Fams   # of Peds                       |                   |                         |                   |           |       |        |
| 65 - 128   1                                    |                   |                         |                   |           |       |        |
| Pairs                                           | Concord. Unaff.   | Discord.                | Concord. Aff.     | Uninform. | Total | Corr.  |
| Parent/Off                                      | 201               | 29                      | 0                 | 40        | 270   | ---    |
| Sib/Sib                                         | 204               | 0                       | 14                | 0         | 218   | 1.0000 |
| Sis/Sis                                         | 66                | 0                       | 9                 | 0         | 75    | 1.0000 |
| Bro/Bro                                         | 29                | 0                       | 3                 | 0         | 32    | 1.0000 |
| Bro/Sis                                         | 109               | 0                       | 2                 | 0         | 111   | 1.0000 |
| Grandp.                                         | 228               | 40                      | 0                 | 50        | 318   | ---    |
| Avunc.                                          | 438               | 0                       | 0                 | 0         | 438   | ---    |
| Half Sib                                        | 12                | 0                       | 0                 | 0         | 12    | ---    |
| Cousin                                          | 912               | 0                       | 0                 | 0         | 912   | ---    |
| Indiv.'s                                        | Affected          | Unaff.                  | Missing           | Total     |       |        |
| Male                                            | 9                 | 71                      | 14                | 94        |       |        |
| Female                                          | 10                | 75                      | 17                | 102       |       |        |
| Unknown                                         | 0                 | 0                       | 0                 | 0         |       |        |
| Total                                           | 19                | 145                     | 31                | 196       |       |        |
| Founder                                         | 0                 | 29                      | 28                | 57        |       |        |
| Nonfound.                                       | 19                | 116                     | 0                 | 135       |       |        |
| Singleton                                       | 0                 | 0                       | 3                 | 3         |       |        |
| Total                                           | 19                | 145                     | 31                | 195       |       |        |
