# Supplementary material
Source: PubMed Central journal article supplement (PMC3983591)
Supplement: gmb-37-171-s006.pdf [file gmb-37-171-s006.pdf]

10:44 Thursday, January 11, 2014

Pedigree file name: aic\_gemepo\_v3\_CFC.txt

Brief structure of the pedigree:

|                             | Number  |
|-----------------------------|---------|
| Individuals in total        | 196     |
| Inbreds in total            | 26      |
| Evaluated individuals       | 196     |
| Inbreds in evaluated        | 26      |
| Sires in total              | 65      |
| -Progeny                    | 136     |
| Dams in total               | 66      |
| -Progeny                    | 135     |
| Individuals with progeny    | 131     |
| Individuals with no progeny | 65      |
| Founders                    | 60      |
| -Progeny                    | 109     |
| -Sires                      | 24      |
| -Progeny                    | 49      |
| -Dams                       | 34      |
| -Progeny                    | 63      |
| -with no progeny            | 2       |
| Non-founders                | 136     |
| -Sires                      | 41      |
| -Progeny                    | 87      |
| -Dams                       | 32      |
| -Progeny                    | 72      |
| -Only with known sire       | 1       |
| -Only with known dam        | 0       |
| -with known sire and dam    | 135     |
| Full-sib groups             | 24      |
| -Average family size        | 3.83333 |
| -Maximum                    | 12      |
| -Minimum                    | 2       |

Distribution of inbreeding coefficients

|                  |    |
|------------------|----|
| 0.00 < F <= 0.05 | 23 |
| 0.05 < F <= 0.10 | 3  |
| 0.10 < F <= 0.15 | 0  |
| 0.15 < F <= 0.20 | 0  |
| 0.20 < F <= 0.25 | 0  |
| 0.25 < F <= 0.30 | 0  |
| 0.30 < F <= 0.35 | 0  |
| 0.35 < F <= 0.40 | 0  |
| 0.40 < F <= 0.45 | 0  |
| 0.45 < F <= 0.50 | 0  |
| 0.50 < F <= 0.55 | 0  |
| 0.55 < F <= 0.60 | 0  |
| 0.60 < F <= 0.65 | 0  |
| 0.65 < F <= 0.70 | 0  |
| 0.70 < F <= 0.75 | 0  |
| 0.75 < F <= 0.80 | 0  |
| 0.80 < F <= 0.85 | 0  |
| 0.85 < F <= 0.90 | 0  |
| 0.90 < F <= 0.95 | 0  |
| 0.95 < F <= 1.00 | 0  |

Longest ancestral path (LAP):

|    |    |
|----|----|
| 0  | 60 |
| 1  | 4  |
| 2  | 2  |
| 3  | 5  |
| 4  | 4  |
| 5  | 12 |
| 6  | 43 |
| 7  | 21 |
| 8  | 13 |
| 9  | 12 |
| 10 | 15 |
| 11 | 3  |
| 12 | 2  |

A: Number of individuals  
 B: Number of inbreds  
 C: Number of founders  
 D: Number of individuals with both known parents  
 E: Number of individuals with no progeny

| Group | A   | B  | C  | D   | E  |
|-------|-----|----|----|-----|----|
| Total | 196 | 26 | 60 | 135 | 65 |
| 1     | 145 | 17 | 29 | 116 | 43 |
| 2     | 19  | 9  | 0  | 19  | 19 |

F: Number of unique ancestors for the group (excluding ancestors in the group)  
 G: Average inbreeding coefficients  
 H: Average inbreeding coefficients in the inbreds  
 I: Maximum of inbreeding coefficients  
 J: Minimum of inbreeding coefficients

| Group | F   | G          | H         | I         | J          |
|-------|-----|------------|-----------|-----------|------------|
| Total | 0   | 0.00367457 | 0.0277006 | 0.0625    | 0.00390625 |
| 1     | 112 | 0.00398707 | 0.0340074 | 0.0625    | 0.0078125  |
| 2     | 122 | 0.00747841 | 0.0157878 | 0.0375977 | 0.00390625 |

K: Average numerator relationships (Reciprocals + Self-relationships)  
 L: Average numerator relationships (Self-relationships are excluded)  
 M: Average number of discrete generation equivalents (or average of average number of generations)  
 N: Maximum number of discrete generation equivalents  
 O: Minimum number of discrete generation equivalents

| Group | K         | L         | M       | N       | O       |
|-------|-----------|-----------|---------|---------|---------|
| Total | 0.0478011 | 0.0428992 | 1.51483 | 3.85352 | 0       |
| 1     | 0.0718707 | 0.0653976 | 1.67882 | 3.46875 | 0       |
| 2     | 0.100179  | 0.0497732 | 2.78829 | 3.85352 | 1.99805 |
